# Supplementary material for: Photocatalytic WO3/TiO2 nanowires: WO3 polymorphs influencing the atomic layer deposition of TiO2
Source: Royal Society of Chemistry journal article supplement (doi:10.1039/c6ra18899k), 2016-01-01
Supplement: c6ra18899k1.pdf [file c6ra18899k1.pdf]

### Supporting information

#### Photocatalytic WO<sub>3</sub>/TiO<sub>2</sub> nanowires: WO<sub>3</sub> polymorphs influencing the ALD nucleation of TiO<sub>2</sub>

**Dávidné Nagy<sup>1</sup>, Tamás Firkala<sup>2</sup>, Eszter Drotár<sup>3</sup>, Ágnes Szegedi<sup>3</sup>, Krisztina László<sup>4</sup>,  
Imre Miklós Szilágyi<sup>2,5</sup>**

<sup>1</sup>Institute for Materials and Processes, School of Engineering, The University of Edinburgh, The King's Buildings, Mayfield Road, Edinburgh, EH9 3JL, United Kingdom

<sup>2</sup>Department of Inorganic and Analytical Chemistry, Budapest University of Technology and Economics, Szent Gellért tér 4., Budapest, H-1111, Hungary

<sup>3</sup>Hungarian Academy of Sciences, Research Centre for Natural Sciences, Institute of Materials and Environmental Chemistry, Magyar tudósok körútja 2., Budapest, H-1117, Hungary

<sup>4</sup>Department of Physical Chemistry and Materials Science, Budapest University of Technology and Economics, Budafoki út 8., Budapest, H-1111, Hungary

<sup>5</sup>MTA-BME Technical Analytical Research Group of the Hungarian Academy of Sciences, Szent Gellért tér 4., Budapest, H-1111, Hungary

Table S1. Fragments of gases evolved during the EGA-MS study of as-prepared, non-washed h-WO<sub>3</sub> NWs in air

| <b>m/z</b> | <b>MS fragments</b>                            | <b>Evolved gases</b>              |
|------------|------------------------------------------------|-----------------------------------|
| 14         | N <sup>+</sup>                                 | NH <sub>3</sub>                   |
| 15         | NH <sup>+</sup>                                | NH <sub>3</sub>                   |
| 16         | O <sup>+</sup> , NH <sub>2</sub> <sup>+</sup>  | O <sub>2</sub> , NH <sub>3</sub>  |
| 17         | OH <sup>+</sup> , NH <sub>3</sub> <sup>+</sup> | H <sub>2</sub> O, NH <sub>3</sub> |
| 18         | H <sub>2</sub> O <sup>+</sup>                  | H <sub>2</sub> O                  |
| 19         | HOD <sup>+</sup>                               | HOD                               |
| 30         | NO <sup>+</sup>                                | NH <sub>3</sub>                   |
| 35         | <sup>35</sup> Cl <sup>+</sup>                  | HCl                               |
| 36         | H <sup>35</sup> Cl <sup>+</sup>                | HCl                               |
| 37         | <sup>37</sup> Cl <sup>+</sup>                  | HCl                               |
| 38         | H <sup>37</sup> Cl <sup>+</sup>                | HCl                               |
| 44         | N <sub>2</sub> O <sup>+</sup>                  | NH <sub>3</sub>                   |
| 48         | SO <sup>+</sup>                                | SO <sub>2</sub>                   |
| 64         | SO <sub>2</sub> <sup>+</sup>                   | SO <sub>2</sub>                   |

Sample: h-WO<sub>3</sub> MW  
Size: 29.7209 mg  
Method: 10C-600

### TGA-DTA

File: D:\...h-WO<sub>3</sub>-MW-lev-600C-MS\_kiért.001  
Operator: ND  
Run Date: 19-Jul-2012 13:48  
Instrument: 2960 SDT V2.3B

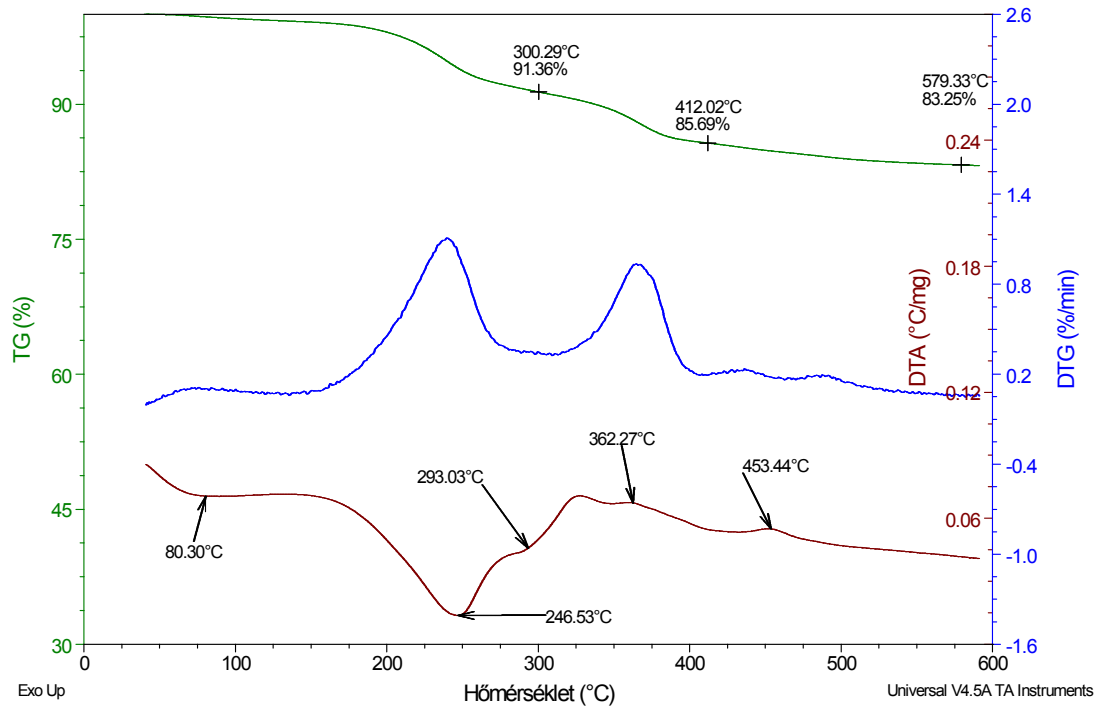

Fig. S1. TG/DTG/DTA curves of as-prepared, non-washed h-WO<sub>3</sub> NWs in air

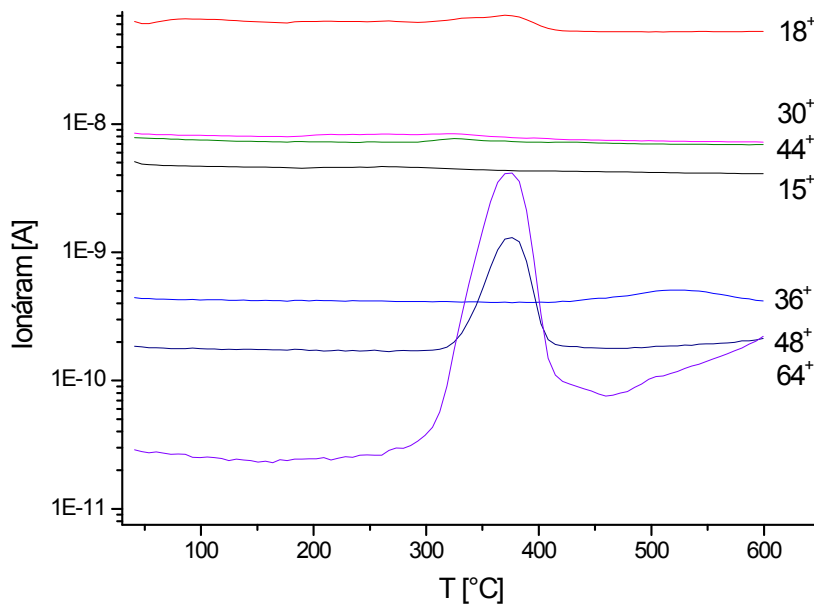

Fig. S2. Evolved gas analysis (EGA)-MS curves of as-prepared, non-washed h-WO<sub>3</sub> NWs in air

Sample: h-WO<sub>3</sub> MW2  
Size: 20.9368 mg  
Method: 10C-600

### TGA-DTA

File: D:\...h-WO<sub>3</sub>-MW2-lev-600C\_kiert.001  
Operator: SZI  
Run Date: 08-Aug-2012 15:13  
Instrument: 2960 SDT V2.3B

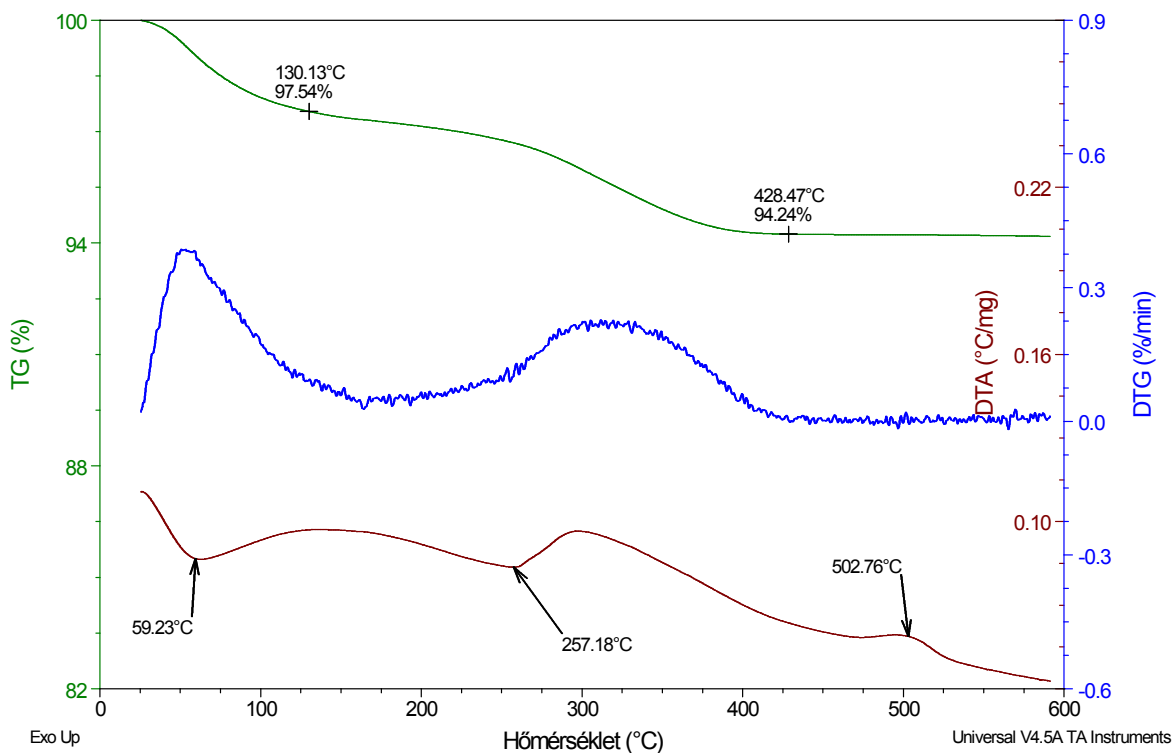

Fig. S3. TG/DTG/DTA curves of washed h-WO<sub>3</sub> NWs in air

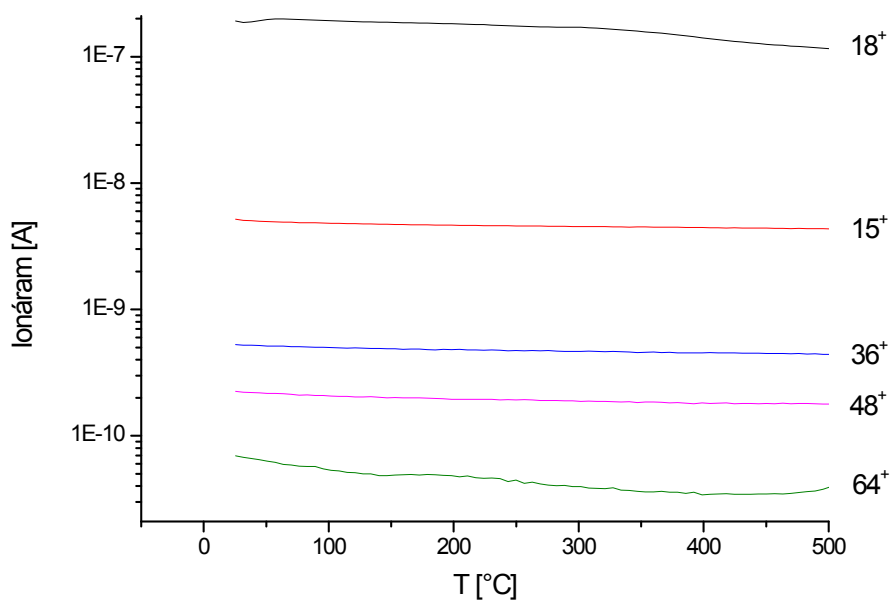

Fig. S4. TG/DTG/DTA curves of washed h-WO<sub>3</sub> NWs in air

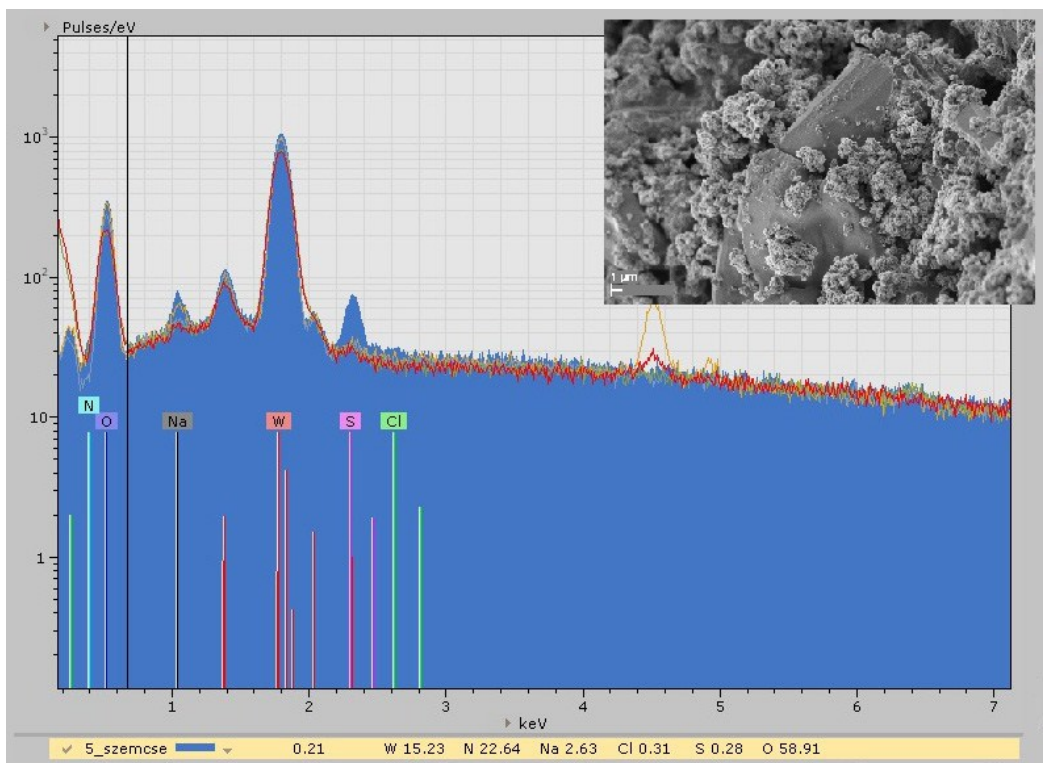

Fig. S5. SEM-EDX results of as-prepared, non-washed h-WO<sub>3</sub> NWs

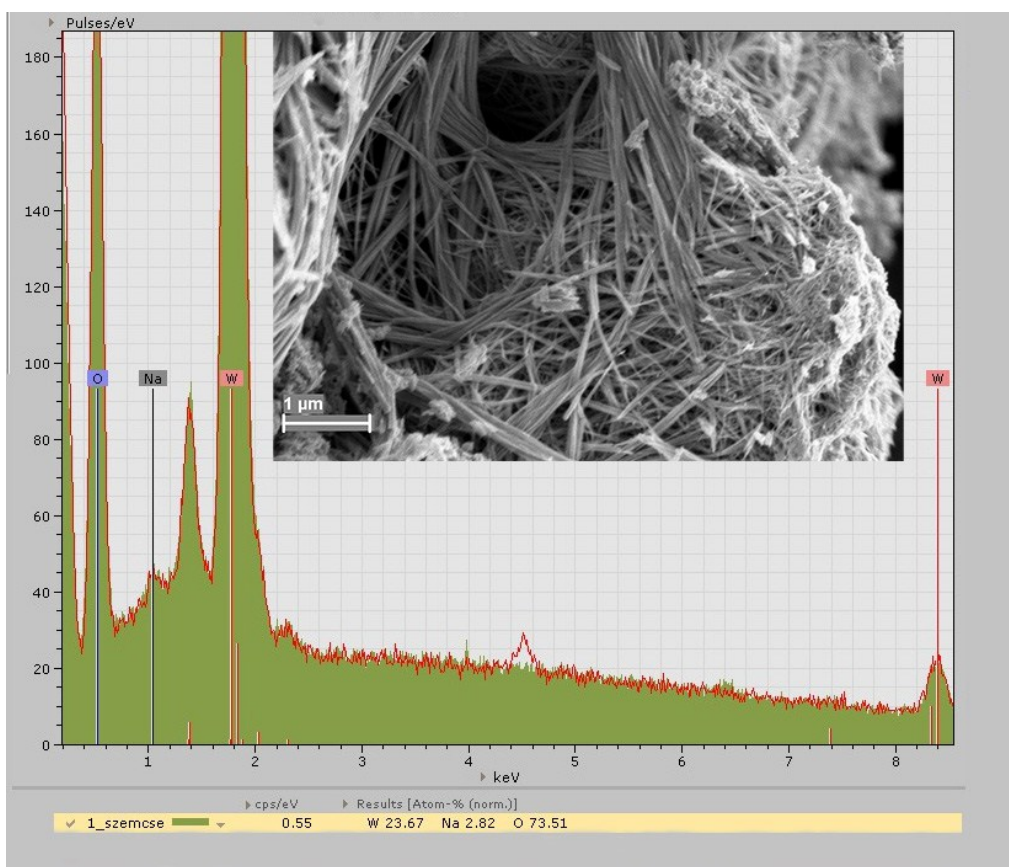

Fig. S6. SEM-EDX results of as-prepared, washed h-WO<sub>3</sub> NWs

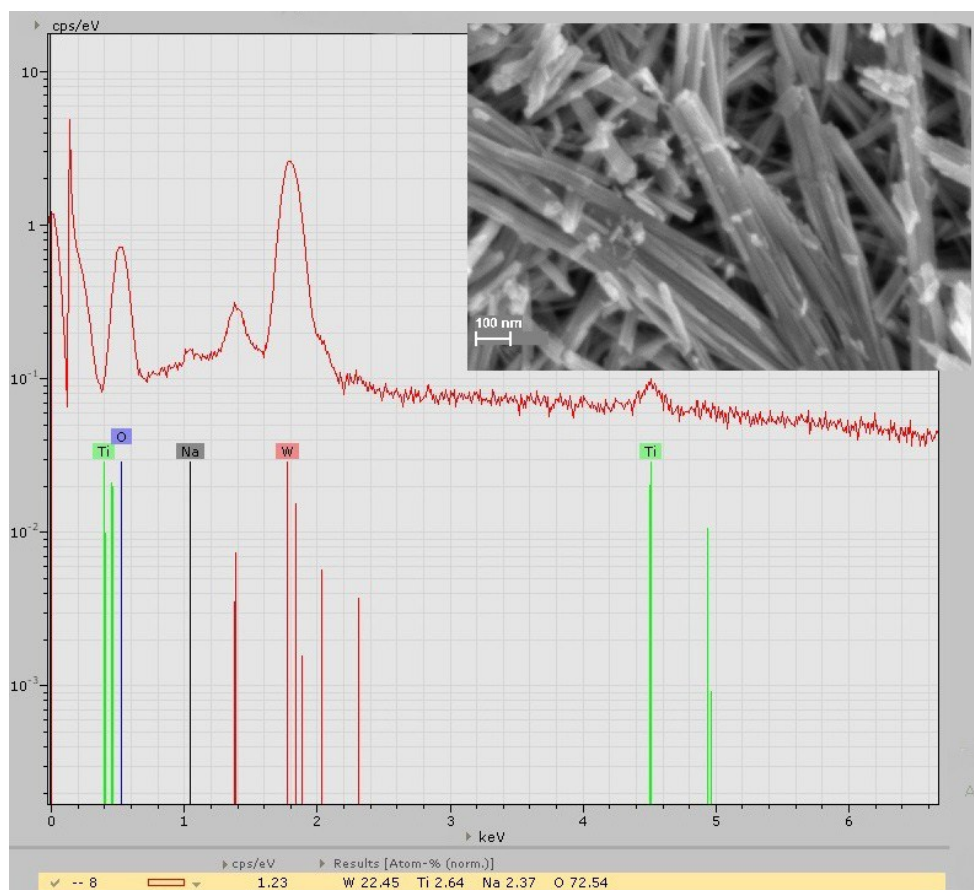

Fig. S7. SEM-EDX results of as-prepared, washed h-WO<sub>3</sub>/TiO<sub>2</sub> NWs

|                                         | Elemental distribution (wt. %) |       |      |      |       |      |      |
|-----------------------------------------|--------------------------------|-------|------|------|-------|------|------|
|                                         | W                              | O     | Na   | Ti   | N     | S    | Cl   |
| non-washed h-WO <sub>3</sub> NWs        | 15.23                          | 58.91 | 2.63 | 0    | 22.64 | 0.28 | 0.31 |
| washed h-WO <sub>3</sub> NWs            | 23.67                          | 73.51 | 2.82 | 0    | 0     | 0    | 0    |
| h-WO <sub>3</sub> /TiO <sub>2</sub> NWs | 22.45                          | 72.54 | 2.37 | 2.64 | 0     | 0    | 0    |

Table S2. Summarizing EDX results for selected nanostructures

Sample: h-WO<sub>3</sub> MW2 TiO<sub>2</sub>  
Size: 14.8224 mg  
Method: 10C-600

### TGA-DTA

File: h-WO<sub>3</sub>-MW2-TiO<sub>2</sub>-lev-600C\_kiertekelt.001  
Operator: SZI  
Run Date: 16-Aug-2012 13:14  
Instrument: 2960 SDT V2.3B

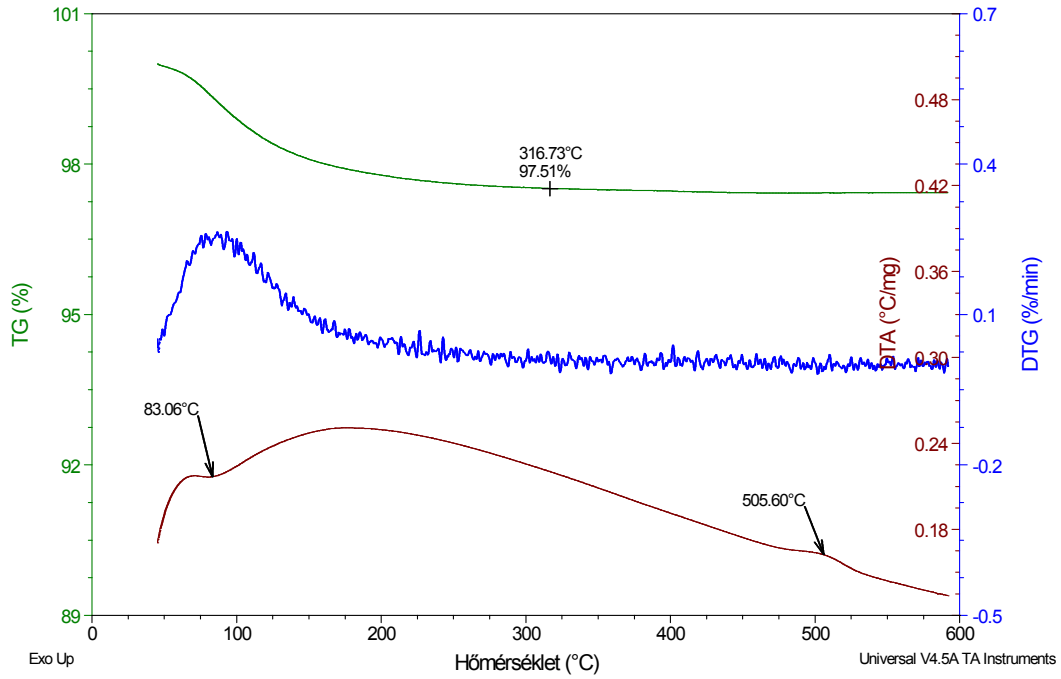

Fig. S8. TG/DTG/DTA curves of h-WO<sub>3</sub>/TiO<sub>2</sub> NWs in air

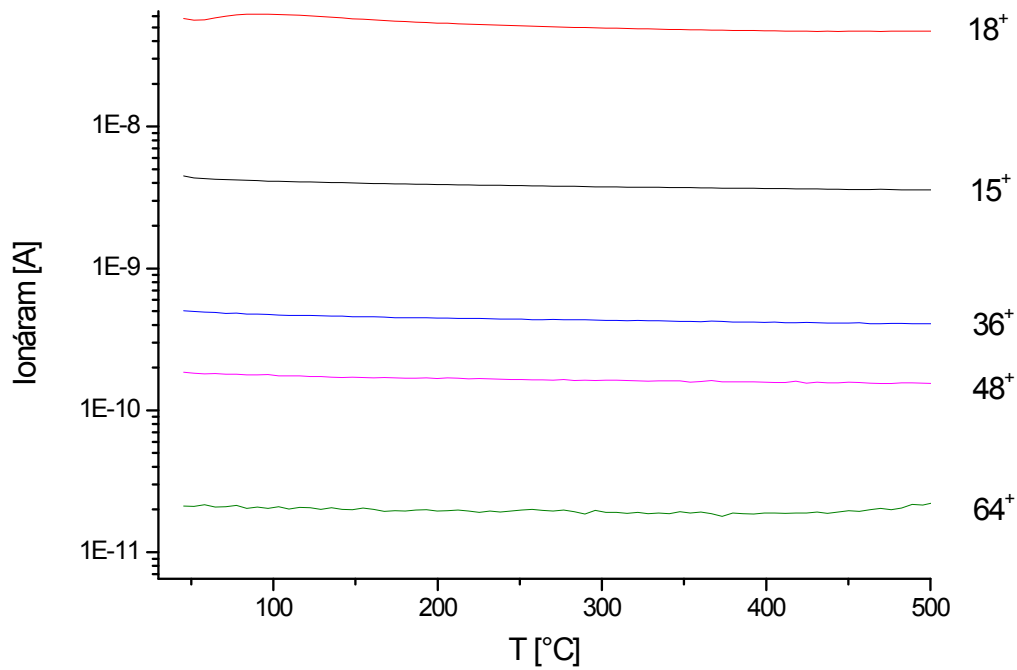

Fig. S9. TG/DTG/DTA curves of h-WO<sub>3</sub>/TiO<sub>2</sub> NWs in air
